1 **NSun2 deficiency promotes tau hyperphosphorylation and neurodegeneration through**  
2 **epitranscriptomic regulation of miR-125b**

3 Yoon A. Kim<sup>1,2</sup>, Jennifer Blaze<sup>3,4</sup>, Tristan Winters<sup>1,2</sup>, Atul Kumar<sup>2</sup>, Ellen Tein<sup>1</sup>, Andrew A.  
4 Sproul<sup>1,2</sup>, Andrew F. Teich<sup>1,2</sup>, Francesca Bartolini<sup>2</sup>, Schahram Akbarian<sup>3,4</sup>, Gunnar Hargus<sup>1,2</sup>,  
5 Ismael Santa-Maria<sup>1,2,\*</sup>

6  
7  
8

9 **Affiliations:**

10 <sup>1</sup> Taub Institute for Research on Alzheimer's Disease & the Aging Brain, Columbia University, New  
11 York, NY, USA.

12 <sup>2</sup> Department of Pathology & Cell Biology, Columbia University, New York, NY, USA.

13 <sup>3</sup> Friedman Brain Institute, Icahn School of Medicine at Mount Sinai, New York, NY, USA.

14 <sup>4</sup> Department of Psychiatry, Icahn School of Medicine at Mount Sinai, New York, NY, USA.

15  
16  
17  
18

19 \* Correspondence should be addressed to [is2395@cumc.columbia.edu](mailto:is2395@cumc.columbia.edu)

20  
21  
22  
23  
24  
25

26 **Keywords**

27 Alzheimer's disease, NSun2, neurodegeneration, Tau proteostasis, microRNA, methylation.

28  
29  
30

31 **Author contributions**

32 I.S.M and Y.K conceptualized the project and designed the study methodology. Y.K., J.B., T.W., A.K., E.  
33 T and A.A.S., performed research; A.A.S., A.F.T, F.B., S.A. and G.H. contributed resources (study  
34 materials, iPSC derived neuronal cultures, *post-mortem* brain samples). A.A.S., A.F.T, F.B., S.A., G.H.,  
35 and I.S.M supervised or managed the research. Y.K. and I.S.M. analyzed, interpreted and visualized the  
36 data; Y.K. and I.S.M. wrote the initial manuscript paper; All authors provided critical feedback and  
37 contributed to the final manuscript.

38  
39  
40

41

42

43

44 **Abstract**

45 Overproduction or suppression of certain microRNAs (miRNAs) in Alzheimer's disease (AD) brains  
46 promote alterations in tau proteostasis and neurodegeneration. However, the mechanisms governing how  
47 specific miRNAs are dysregulated in AD brains are still under investigation. Epitranscriptomic regulation  
48 adds a layer of post-transcriptional control to brain function during development and adulthood. NOP2/Sun  
49 RNA methyltransferase 2 (NSun2) is one of the few known brain-enriched methyltransferases able to  
50 modify mammalian non-coding RNAs and loss of function autosomal-recessive mutations in NSUN2 have  
51 been associated with neurological abnormalities in humans. Here, we provide evidence that NSun2 is  
52 expressed in adult human neurons in the hippocampal formation and prefrontal cortex. When we evaluated  
53 NSun2 protein expression in *post-mortem* brain tissue from AD patients we find is dysregulated which was  
54 also found in mice and human cellular AD models. To probe these observed alterations were unique to AD  
55 we further evaluated brain tissue from other tauopathies, observing NSun2 protein levels were similar  
56 between cases and controls. In a well-established *Drosophila melanogaster* model of tau-induced toxicity  
57 we investigated the pathological role of NSun2 observing that reduction of NSun2 protein levels  
58 exacerbated tau toxicity, while overexpression of NSun2 partially abrogated the toxic effects. We further  
59 show using human induced pluripotent stem cell (iPSC) derived neuronal cultures that NSun2 deficiency  
60 results in tau hyperphosphorylation and we found in primary hippocampal neuronal cultures NSun2 levels  
61 decrease in response to amyloid-beta oligomers (A $\beta$ O). Furthermore, in mice, we observed that NSun2  
62 deficiency promotes aberrant levels of m6A methylated miR-125b and tau hyperphosphorylation.  
63 Altogether, our study supports that neuronal NSun2 deficiency in AD promotes neurodegeneration by  
64 altering tau phosphorylation and tau toxicity through an epitranscriptomic regulatory mechanism and  
65 highlights a novel avenue for therapeutic targeting.

66  
67  
68  
69  
70

71 **Introduction**

72 MiRNAs, a class of non-coding small RNAs, are part of a vital regulatory mechanism that prevents the  
73 deposition of tau protein. Several miRNAs, have been shown to regulate tau proteostasis by modulating tau  
74 synthesis or post-translational modifications on tau, such as phosphorylation<sup>1, 2</sup>. However, mechanisms  
75 governing how miRNAs are regulated in the brain or how they are dysregulated during the disease process  
76 are poorly understood<sup>3-12</sup>. MiRNAs can be regulated at the transcriptional or post-transcriptional level<sup>13, 14</sup>.  
77 One of the most frequent post-transcriptional modifications of RNA is methylation<sup>15-18</sup>. However, the  
78 specific role that RNA methyltransferases play in neurodegeneration is poorly investigated. NSun2 is one  
79 of the few brain-enriched methyltransferases known to facilitate methylation of non-coding RNAs,  
80 including microRNAs<sup>19-23</sup>. Based on the previously reported putative neuroprotective role of NSun2 and its  
81 constitutive expression in the mouse brain cortex and hippocampus<sup>19, 24, 25</sup>, we decided to explore the status  
82 of NSun2 in AD models and human tissue. Here, we show that Nsun2 is downregulated in AD, modulates  
83 tau toxicity *in vivo*, and regulates tau phosphorylation in part by promoting epitranscriptomic alterations in  
84 miR-125b.

85

86

87

88

89

90

91

92

93

94

95

96

97 **Results**

98 **NSun2 RNA methyltransferase is dysregulated in Alzheimer's Disease brains.**

99 *Post-mortem* examination of human control brains shows NSun2 positive immunostaining in neurons of  
100 the hippocampal formation and the prefrontal cortex (Brodmann area 9). Immunolabeling of the nucleus  
101 and dendrites shows for the first time that NSun2 protein is expressed in neurons in the adult human brain  
102 (**Supplementary Figure 1**). To determine whether alterations in NSun2 are found in AD we next performed  
103 NSun2 immunohistochemistry on brain sections from AD cases and controls (**Supplementary Table 1**).  
104 Prefrontal cortex and hippocampal formation were analyzed as these are some of the most affected brain  
105 regions in AD. The most salient feature was the neuronal nuclear decrease of NSun2 immunoreactivity in  
106 both brain regions of AD cases compared to controls (**Figure 1A**). Apart from the decrease of nuclear  
107 immunoreactivity, AD patients also show a decreased staining in the soma and neurites (right panels,  
108 **Figure 1A**).

109 We then performed quantitative Western blot analysis to confirm whether levels of NSun2 are reduced in  
110 AD brains. Immunoblots using antisera specifically recognizing human NSun2<sup>26,27</sup> show a decrease in the  
111 levels of NSun2 both in hippocampal formation and the prefrontal cortex, in comparison to samples from  
112 control subjects (**Figure 1 B, C**). In this case, the reduction was more pronounced in the hippocampal  
113 formation (53.18% decrease,  $P = 0.0009$ ) than in the prefrontal cortex (41.36% decrease,  $P < 0.0001$ )  
114 (**Figure 1B, C**). Importantly, no significant difference was observed when comparing AD cases and  
115 controls in the cerebellum, a brain area devoid of AD pathology (**Figure 1D**). Notably, we did not detect a  
116 difference in the beta-III tubulin neuronal marker<sup>28</sup> indicating that our observed differences might not be  
117 secondary to neuronal loss. However, AD brains did show significantly higher levels of NSun2 mRNA in  
118 the prefrontal cortex, although quantitative real-time PCR (QPCR) analysis did not show a significant  
119 difference in the levels of NSun2 mRNA in the hippocampus, suggesting a compensatory mechanism  
120 observable in the prefrontal cortex, a brain area that degenerates later in the disease process  
121 (**Supplementary Figure 2**). Furthermore, we analyzed publicly available proteomic and transcriptomic  
122 datasets<sup>29,30</sup> which showed results in agreement with our findings (**Supplementary Figure 3**).

123 It is unlikely that NSun2 alone among methyltransferases has the ability to regulate microRNAs. Indeed, a  
124 possible cooperative mechanism between NSun2 and Methyltransferase Like 3 (Mettl3) has been  
125 proposed<sup>31</sup>. To investigate whether AD brains also show biochemical changes in Mettl3 we examined the  
126 levels of Mettl3 expression in control and AD brains. Western blot analysis did not show a significant  
127 decrease in Mettl3 levels (**Supplementary Figure 4A, B**). In addition, analysis of a publicly available  
128 transcriptomic dataset did not show a significant change in Mettl3 mRNA levels corroborating our findings  
129 (**Supplementary Figure 4C**).

130 Next, we sought to confirm in two distinctive AD models whether NSun2 downregulation is also observed  
131 in these model systems. First, we analyzed the J20 mouse model of AD. This mouse model overexpresses  
132 human Amyloid Precursor Protein (APP) with two mutations (APP KM670/671NL-V717F) linked to  
133 familial AD<sup>32</sup>. J20 mice develop robust amyloid beta (A $\beta$ ) pathology by five to seven months of age,  
134 showing learning and memory deficits and changes in synaptic plasticity<sup>32</sup>. Thus, we performed Western  
135 blot analysis in hippocampal samples from 6-month-old J20 mice. We observed a significant reduction of  
136 NSun2 levels in the hippocampus compared to wild type controls (27.57% decrease,  $P = 0.0055$ ) (**Figure**  
137 **1E**). In addition, we were able to recapitulate the alterations in NSun2 observed in AD brains in induced  
138 pluripotent stem cell (iPSC) derived neurons from an AD heterozygous knockin hiPSC line (IMR90, cl.4  
139 backbone, WiCell) harboring the APP V717L London mutation<sup>33-39</sup>. Neurons bearing this mutation show  
140 alterations in APP processing, and tau proteostasis<sup>40, 41</sup>. In this AD *in vitro* model, we observed a significant  
141 reduction in the levels on NSun2 when compared to isogenic controls (45.95% decrease,  $P = 0.0003$ )  
142 (**Figure 1F**).

143 To further explore whether downregulation of NSun2 is a common event among other tauopathies we  
144 performed immunohistochemistry and Western blot analysis on Primary Age-Related Tauopathy (PART)<sup>42</sup>  
145 and Progressive Supranuclear Palsy (PSP) (**Supplementary Figure 5**)<sup>43, 44</sup> using samples from the  
146 hippocampal formation and the Globus pallidus respectively; main areas affected in the brains of patients  
147 with these disorders<sup>42, 44</sup>. Quantitative Western blot analysis using NSun2 antisera showed no significant

148 difference in the levels of NSun2 (**Supplementary Figure 5D, E**). These results suggest reduction of  
149 NSun2 protein levels in human brains is specific to AD when compared to other tauopathies.

150

### 151 **Deficiency of NSun2 promotes alterations in tau phosphorylation and tau toxicity.**

152 Next, we asked whether NSun2 influences tau toxicity *in vivo*. Many molecular mechanisms of post-  
153 transcriptional regulation including epitranscriptomic modifications and microRNA regulation are  
154 conserved between *Drosophila melanogaster* (fruit flies) and humans<sup>45</sup>. Furthermore, fruit flies have proven  
155 to be useful for modeling essential mechanisms of tauopathy and tau biology<sup>46</sup>. Using a conditional  
156 expression system, we overexpressed either NSun2 or a short interfering RNA (siRNA) against NSun2.  
157 First, human tau was co-expressed with a siRNA control in the *Drosophila* eye, producing a rough eye  
158 phenotype, confirming that the model system was functioning (**Figure 2A**). Next, human tau and NSun2  
159 siRNA were co-expressed resulting in an exacerbation of the phenotype (**Figure 2A**). In contrast, co-  
160 expression of human tau and *Drosophila* NSun2 showed a partial reversal of the rough eye phenotype,  
161 consistent with a protective role, demonstrating bidirectionality (**Figure 2B**). Quantitative assessment of  
162 these phenotypes revealed that these findings are highly significant (**Figure 2A, B**), indicating that NSun2  
163 influences tau toxicity in this system.

164 We next set out to investigate in human neurons whether reduction of NSun2 might modulate tau toxicity  
165 by altering tau phosphorylation levels. To this aim we took advantage of iPSC derived neurons as a favored  
166 *in vitro* model system to interrogate and investigate molecular events driving tau dysregulation in humans<sup>47-</sup>  
167 <sup>49</sup>. Efficient gene knockdown was tested using a pool of short hairpin RNA and its respective scramble  
168 control. Our system enabled us to significantly reduce NSun2 protein levels (31.88% decrease,  $P = 0.0018$ )  
169 in the iPSC-derived neuronal cultures (**Supplementary Figure 6**), resembling a similar reduction observed  
170 in human cortex of AD brains. Strikingly, using a battery of anti-phospho-tau antibodies (**Figure 2C**),  
171 Western blot analysis showed a significant increase in the levels of intracellular phosphorylated tau in  
172 several of the phospho-epitopes tested (pSer-199-202, pSer-214, pSer-262, pSer-396-404) upon NSun2  
173 knockdown (**Figure 2D**). In addition, we performed immunostainings on the human iPSC-derived neuronal

174 cultures using the anti phospho-serine 214-tau antibody on the neuronal cultures showing and increase in  
175 the number of positive pSer214tau neuronal cells upon NSun2 protein knockdown compared to controls  
176 (**Supplementary Figure 7**).

177

### 178 **NSun2 is downregulated in response to A $\beta$ O.**

179 One of the main factors that distinguish AD from other primary tauopathies is the accumulation of A $\beta$ O  
180 species in the brain, which correlates with cognitive decline and/or disease progression in AD patients and  
181 animal models<sup>50</sup>. Considering the observed significant reduction of NSun2 levels in the AD brains (**Figure**  
182 **1**), we next asked whether A $\beta$  could be triggering this pathological alteration. In order to determine if  
183 oligomeric A $\beta$ , in a sub-apoptotic concentration (**Supplementary Figure 8**), could promote  
184 downregulation of NSun2 levels we exposed rat primary hippocampal neurons from wild type rats to  
185 300nM A $\beta$ O. This resulted in a progressive decrease of NSun2 protein levels over 24 hours of exposure  
186 (**Figure 3A**). Conversely, NSun2 mRNA levels were not affected as a result of the A $\beta$ O exposure (**Figure**  
187 **3B**). Concomitantly, at 24 hours we observed a significant increase in phospho-tau levels assessed by  
188 western blot using an anti phospho-serine 214 tau antibody (198% increased,  $P = 0.0102$ ; **Figure 3C**).  
189 When we performed immunostaining of the neuronal cell culture, consistent with the western blot results,  
190 we observed a reduction in the nuclear and dendritic (MAP2 positive) NSun2 signal (**Supplementary**  
191 **Figure 9**). Similarly, to neuronal cultures exposed to A $\beta$ O, shRNA mediated knockdown of NSun2 protein  
192 (**Supplementary Figure 10**) resulted in a significant increase of in the levels of phospho-tau, when tested  
193 using antibodies against tau phospho-serine 214 (57.89 % increased,  $P = 0.0216$ ) and tau phospho-threonine  
194 231 respectively (33.82 % increased,  $P = 0.0215$ ) (**Figure 3D, E**). Remarkably, when we performed co-  
195 immunostaining on human brain sections of AD patients, we found higher levels of phospho-tau (AT8  
196 immunostaining) in neurons with low NSun2 immunostaining (**Figure 3F**). Taken together, these results  
197 suggest that downregulation of NSun2 might explain changes on tau proteostasis observed in AD brains by  
198 altering a regulatory post-transcriptional mechanism.

199

200 **NSun2 deficiency promotes epitranscriptomic alterations in miR-125b.**

201 It has been shown that NSun2 mediates  $N^6$ -adenosine methylation (m6A) of miR-125b-5p (abbreviated  
202 hereafter as miR-125b), repressing its processing and function<sup>23</sup>. Importantly, miR-125b is found to be  
203 upregulated in AD<sup>51-54</sup> and its upregulation promotes tau hyperphosphorylation and cognitive deficits *in*  
204 *vivo*<sup>55</sup>. To study whether NSun2 deficiency alters m6A methylation of miR-125b and promotes tau  
205 hyperphosphorylation *in vivo*, we performed RNA immunoprecipitation and histological analysis. RNA  
206 isolated from NSun2 knockout mice brain cortical samples was immunoprecipitated using an anti-m6A  
207 antibody and the presence of methylated miR-125b in the immunoprecipitated materials was analyzed by  
208 QPCR. In **Figure 4A**, we show the m6A antibody could effectively immunoprecipitate miR-125b. As a  
209 negative control, using IgG failed to immunoprecipitate miR-125b. The levels of methylated miR-125b  
210 decreased significantly in brain samples from NSun2 deficient mice (43.90 %,  $P = 0.0182$ ) (**Figure 4A**).  
211 As expected, miR-125b levels were significantly increased in the input samples from NSun2 knockout mice  
212 brains (**Figure 4B**). Similarly, the levels of miR-125b are increase in AD frontal cortex samples  
213 (**Supplementary Figure 11**). To further confirm NSun2 deficiency promotes tau alterations *in vivo*, we  
214 performed AT8 (phospho-ser-202/Thr205-tau) immunostaining on the brains of aged NSun2 conditional  
215 knockout animals. Strikingly, we observed increased immunoreactivity of AT8 positive neurons in the  
216 frontal cortex and dentate gyrus of NSun2 deficient mice (right panels, **Figure 4C**). These results support  
217 that NSun2 deficiency promotes alterations in m6A methylation of miR-125b and tau  
218 hyperphosphorylation.

219

220

221

222

223

224

225



## 226 **Discussion**

227 Our results confirm that NSun2, one of the best described RNA methyltransferases in higher eukaryotes<sup>56-</sup>  
228 <sup>62</sup>, is expressed in the adult human brains (**Figure 1**). However, current understanding of the role that  
229 epitranscriptomic regulation plays in brain function and dysfunction is limited<sup>63-65</sup>. NSun2 deficiency has a  
230 negative impact on learning and memory in fruit flies and causes intellectual disability and neurological  
231 abnormalities in humans<sup>62, 66</sup>. Here, we show NSun2 immunostaining localized in dendrites of neurons in  
232 the hippocampal formation and the frontal cortex (**Figure 1**), suggesting epitranscriptomic regulation of  
233 neuronal synaptic function is taking place in the adult human brain<sup>67</sup>. Further experimental evidence would  
234 be necessary to rule out the role NSun2 plays in synaptic function and regulation. Nevertheless, even though  
235 we only observed positive NSun2 staining in neurons, it should be recalled that NSun2 mRNA is also found  
236 in the transcriptomic profile of other cell types in the brain<sup>68, 69</sup>, reinforcing NSun2's role during  
237 development and in cellular stress responses<sup>19</sup>.

238 To date, several studies have implicated epitranscriptomic regulation of coding and non-coding RNA in  
239 diverse biological functions<sup>65,70</sup>. Here, we show NSun2 RNA methyltransferase protein levels are decreased  
240 in AD brains, denoting epitranscriptomic alterations in the AD process (**Figure 1**). Unexpectedly, our  
241 results show that NSun2 protein is not reduced in PART and PSP cases indicating a distinct disease  
242 mechanism in the AD brains. Future studies will be important to uncover whether NSun2 alterations are  
243 occurring in specific phases or throughout AD progression. Similarly, further characterization of  
244 epitranscriptomic changes and the regulatory proteins of the epitranscriptome (including writers, erasers  
245 and readers) in AD, related tauopathies, and other neurodegenerative disorders is warranted.

246 It has been shown NSun2 methylates miR-125b repressing its processing and function<sup>23</sup>. Here, we have  
247 confirmed miR-125b is upregulated in AD brains in the prefrontal cortex and our results in a *Drosophila*  
248 model of tau toxicity supports a neuroprotective role for NSun2. In addition, we have shown NSun2  
249 deficiency promotes alterations in methylated miR-125b levels and modulates tau proteostasis *in vivo* using  
250 the a NSun2 conditional knockout mouse model. However, it has been described that the loss of NSun2  
251 results in the accumulation of tRNA fragments<sup>71</sup>. Curiously, tRNA fragments function as short RNAs with

252 multi-faceted roles in disease processes<sup>72, 73</sup>, including neurological disorders and possibly AD<sup>74-78</sup>.

253 Therefore, further analysis will be required to uncover other salient roles of NSun2 on the post-  
254 transcriptional regulation of non-coding small RNAs in AD and related neurological disorders.

255 Given that our data supports that NSun2 reduction occurs in response to A $\beta$  accumulation and leads to tau  
256 proteostasis alterations, our study finds preliminary evidence that NSun2 targeting could be of therapeutic  
257 value. One plausible way of modulating NSun2 could be through Proteinase activated-receptor 2 (PAR2),  
258 one of the Proteinase-activated receptors with profound roles in the nervous system<sup>79</sup>. PAR2 has been  
259 shown to modulate NSun2 and miR-125b methylation<sup>80</sup>. Moreover, PAR2 expression is reduced *in vivo* in  
260 response to A $\beta$ . Furthermore, PAR2 receptor levels are found reduced in human AD brains<sup>81</sup> which could  
261 potentially explain our observed alterations in NSun2.

262 In conclusion, our results suggest that tau toxicity is modulated by Nsun2 through regulation of tau  
263 phosphorylation. This conclusion is based on the fact that NSun2 deficiency regulates tau phosphorylation  
264 *in vitro* and *in vivo* and tau toxicity is bidirectionally regulated by NSun2 overexpression and inhibition *in*  
265 *vivo*. Our findings are consistent with NSun2 influencing tau phosphorylation at the post-transcriptional  
266 level, perhaps through microRNA regulation, but this may differ depending on the experimental context.  
267 Future studies to validate role of NSun2 in other disease models and pertinent behavioral studies would be  
268 valuable. It is unlikely that NSun2 is the only methyltransferase with the ability to regulate microRNAs,  
269 but the role of NSun2 is of critical interest, given the extraordinary and unique roles this enzyme plays in  
270 physiology and pathology. Further investigation will provide a better understanding of tau regulation and  
271 advance our understanding of the pathogenesis of neurofibrillary degeneration which might bring us a step  
272 closer to the development of novel therapeutic strategies.

273

274

275

276

277

278 **Study approval**

279 The studies using de-identified *post-mortem* autopsy tissue were reviewed and approved by the Columbia  
280 University institutional review board (IRB) (New York, NY). *Drosophila* studies are not subject to IRB  
281 oversight.

282

283 **Acknowledgments**

284 This work was supported by NIH grants R01NS095922 and P50AG0008702 to I.S.M., R01MH117790 to  
285 S.A., R03NS112785, R21AG070414-01 and K08NS116166-01 to G.H., and R01AG050658 to F.B. and  
286 NIMH Postdoctoral fellowship F32MH115565-01A1 to J.B. Additional support was provided to I.S.M. by  
287 the Alzheimer's Association (NIRG-15-3644-58). A.A.S. is supported by the Henry and Marilyn Taub  
288 Foundation and the Thompson Family Foundation Program (TAME-AD). We want to thank Jean Paul  
289 Vonsattel for neuropathology support. We are grateful to the late Dr. Peter Davies for his generous gift  
290 providing us PHF1 anti-phospho tau antibody. Finally, we want to thank Prof. Dr. Stephan J. Sigrist who  
291 kindly shared with us the transgenic *Drosophila* line.

292

293

294

295

296

297

298

299

300

301

302

303

304 **References**

- 305 1. Millan, M.J. Linking deregulation of non-coding RNA to the core pathophysiology of Alzheimer's  
306 disease: An integrative review. *Prog Neurobiol* **156**, 1-68 (2017).
- 307 2. Reddy, P.H. *et al.* A critical evaluation of neuroprotective and neurodegenerative MicroRNAs in  
308 Alzheimer's disease. *Biochem Biophys Res Commun* **483**, 1156-1165 (2017).
- 309 3. Bartel, D.P. MicroRNAs: genomics, biogenesis, mechanism, and function. *Cell* **116**, 281-297  
310 (2004).
- 311 4. de la Mata, M. *et al.* Potent degradation of neuronal miRNAs induced by highly complementary  
312 targets. *EMBO Rep* **16**, 500-511 (2015).
- 313 5. Gebert, L.F.R. & MacRae, I.J. Regulation of microRNA function in animals. *Nat Rev Mol Cell Biol*  
314 **20**, 21-37 (2019).
- 315 6. Ha, M. & Kim, V.N. Regulation of microRNA biogenesis. *Nat Rev Mol Cell Biol* **15**, 509-524  
316 (2014).
- 317 7. Kim, C.K. *et al.* Differential Stability of miR-9-5p and miR-9-3p in the Brain Is Determined by  
318 Their Unique Cis- and Trans-Acting Elements. *eNeuro* **7** (2020).
- 319 8. Kosik, K.S. The neuronal microRNA system. *Nat Rev Neurosci* **7**, 911-920 (2006).
- 320 9. Kosik, K.S. & Krichevsky, A.M. The Elegance of the MicroRNAs: A Neuronal Perspective.  
321 *Neuron* **47**, 779-782 (2005).
- 322 10. Krol, J. *et al.* Characterizing light-regulated retinal microRNAs reveals rapid turnover as a common  
323 property of neuronal microRNAs. *Cell* **141**, 618-631 (2010).
- 324 11. Park, J.H., Shin, S.Y. & Shin, C. Non-canonical targets destabilize microRNAs in human  
325 Argonautes. *Nucleic Acids Res* **45**, 1569-1583 (2017).
- 326 12. Pawlica, P., Sheu-Gruttadauria, J., MacRae, I.J. & Steitz, J.A. How Complementary Targets  
327 Expose the microRNA 3' End for Tailing and Trimming during Target-Directed microRNA  
328 Degradation. *Cold Spring Harb Symp Quant Biol* **84**, 179-183 (2019).

- 329 13. Kim, V.N., Han, J. & Siomi, M.C. Biogenesis of small RNAs in animals. *Nat Rev Mol Cell Biol*  
330 **10**, 126-139 (2009).
- 331 14. Libri, V., Miesen, P., van Rij, R.P. & Buck, A.H. Regulation of microRNA biogenesis and turnover  
332 by animals and their viruses. *Cell Mol Life Sci* **70**, 3525-3544 (2013).
- 333 15. Zhang, X., Cozen, A.E., Liu, Y., Chen, Q. & Lowe, T.M. Small RNA Modifications: Integral to  
334 Function and Disease. *Trends Mol Med* **22**, 1025-1034 (2016).
- 335 16. Shelton, S.B., Reinsborough, C. & Xhemalce, B. Who Watches the Watchmen: Roles of RNA  
336 Modifications in the RNA Interference Pathway. *PLoS Genet* **12**, e1006139 (2016).
- 337 17. Dominissini, D. *et al.* Topology of the human and mouse m6A RNA methylomes revealed by m6A-  
338 seq. *Nature* **485**, 201-206 (2012).
- 339 18. Cantara, W.A. *et al.* The RNA Modification Database, RNAMDB: 2011 update. *Nucleic Acids Res*  
340 **39**, D195-201 (2011).
- 341 19. Blanco, S. *et al.* Aberrant methylation of tRNAs links cellular stress to neuro-developmental  
342 disorders. *EMBO J* **33**, 2020-2039 (2014).
- 343 20. Hussain, S. *et al.* NSun2-mediated cytosine-5 methylation of vault noncoding RNA determines its  
344 processing into regulatory small RNAs. *Cell Rep* **4**, 255-261 (2013).
- 345 21. Sibbritt, T., Patel, H.R. & Preiss, T. Mapping and significance of the mRNA methylome. *Wiley*  
346 *Interdiscip Rev RNA* **4**, 397-422 (2013).
- 347 22. Sun, Z. *et al.* Expression profiles of long noncoding RNAs associated with the NSUN2 gene in  
348 HepG2 cells. *Mol Med Rep* **19**, 2999-3008 (2019).
- 349 23. Yuan, S. *et al.* Methylation by NSun2 represses the levels and function of microRNA 125b. *Mol*  
350 *Cell Biol* **34**, 3630-3641 (2014).
- 351 24. Blanco, S. & Frye, M. Role of RNA methyltransferases in tissue renewal and pathology. *Curr Opin*  
352 *Cell Biol* **31**, 1-7 (2014).

- 353 25. Chi, L. & Delgado-Olguin, P. Expression of NOL1/NOP2/sun domain (Nsun) RNA  
354 methyltransferase family genes in early mouse embryogenesis. *Gene Expr Patterns* **13**, 319-327  
355 (2013).
- 356 26. Gkatza, N.A. *et al.* Cytosine-5 RNA methylation links protein synthesis to cell metabolism. *PLoS*  
357 *Biol* **17**, e3000297 (2019).
- 358 27. Huang, T., Chen, W., Liu, J., Gu, N. & Zhang, R. Genome-wide identification of mRNA 5-  
359 methylcytosine in mammals. *Nat Struct Mol Biol* **26**, 380-388 (2019).
- 360 28. Caccamo, D.V. *et al.* An immunohistochemical study of neuropeptides and neuronal cytoskeletal  
361 proteins in the neuroepithelial component of a spontaneous murine ovarian teratoma. Primitive  
362 neuroepithelium displays immunoreactivity for neuropeptides and neuron-associated beta-tubulin  
363 isotype. *Am J Pathol* **135**, 801-813 (1989).
- 364 29. Xu, J. *et al.* Regional protein expression in human Alzheimer's brain correlates with disease  
365 severity. *Commun Biol* **2**, 43 (2019).
- 366 30. Zhang, B. *et al.* Integrated systems approach identifies genetic nodes and networks in late-onset  
367 Alzheimer's disease. *Cell* **153**, 707-720 (2013).
- 368 31. Li, Q. *et al.* NSUN2-Mediated m5C Methylation and METTL3/METTL14-Mediated m6A  
369 Methylation Cooperatively Enhance p21 Translation. *J Cell Biochem* **118**, 2587-2598 (2017).
- 370 32. Mucke, L. *et al.* High-level neuronal expression of abeta 1-42 in wild-type human amyloid protein  
371 precursor transgenic mice: synaptotoxicity without plaque formation. *J Neurosci* **20**, 4050-4058  
372 (2000).
- 373 33. Goate, A. *et al.* Segregation of a missense mutation in the amyloid precursor protein gene with  
374 familial Alzheimer's disease. *Nature* **349**, 704-706 (1991).
- 375 34. Chen, G. *et al.* Chemically defined conditions for human iPSC derivation and culture. *Nat Methods*  
376 **8**, 424-429 (2011).
- 377 35. Montesinos, J. *et al.* The Alzheimer's disease-associated C99 fragment of APP regulates cellular  
378 cholesterol trafficking. *EMBO J* **39**, e103791 (2020).

- 379 36. Hu, K. *et al.* Efficient generation of transgene-free induced pluripotent stem cells from normal and  
380 neoplastic bone marrow and cord blood mononuclear cells. *Blood* **117**, e109-119 (2011).
- 381 37. Yu, J. *et al.* Human induced pluripotent stem cells free of vector and transgene sequences. *Science*  
382 **324**, 797-801 (2009).
- 383 38. Yu, J. *et al.* Induced pluripotent stem cell lines derived from human somatic cells. *Science* **318**,  
384 1917-1920 (2007).
- 385 39. Sun, J. *et al.* CRISPR/Cas9 editing of APP C-terminus attenuates beta-cleavage and promotes  
386 alpha-cleavage. *Nat Commun* **10**, 53 (2019).
- 387 40. Muratore, C.R. *et al.* The familial Alzheimer's disease APPV717I mutation alters APP processing  
388 and Tau expression in iPSC-derived neurons. *Hum Mol Genet* **23**, 3523-3536 (2014).
- 389 41. Moore, S. *et al.* APP metabolism regulates tau proteostasis in human cerebral cortex neurons. *Cell*  
390 *Rep* **11**, 689-696 (2015).
- 391 42. Crary, J.F. *et al.* Primary age-related tauopathy (PART): a common pathology associated with  
392 human aging. *Acta Neuropathol* **128**, 755-766 (2014).
- 393 43. Golbe, L.I. Progressive supranuclear palsy. *Semin Neurol* **34**, 151-159 (2014).
- 394 44. Steele, J.C., Richardson, J.C. & Olszewski, J. Progressive Supranuclear Palsy. A Heterogeneous  
395 Degeneration Involving the Brain Stem, Basal Ganglia and Cerebellum with Vertical Gaze and  
396 Pseudobulbar Palsy, Nuchal Dystonia and Dementia. *Arch Neurol* **10**, 333-359 (1964).
- 397 45. Dai, Q., Smibert, P. & Lai, E.C. Exploiting Drosophila genetics to understand microRNA function  
398 and regulation. *Curr Top Dev Biol* **99**, 201-235 (2012).
- 399 46. Papanikolopoulou, K. & Skoulakis, E.M. The power and richness of modelling tauopathies in  
400 Drosophila. *Mol Neurobiol* **44**, 122-133 (2011).
- 401 47. Karch, C.M. *et al.* A Comprehensive Resource for Induced Pluripotent Stem Cells from Patients  
402 with Primary Tauopathies. *Stem Cell Reports* **13**, 939-955 (2019).
- 403 48. Oakley, D.H. *et al.* Continuous Monitoring of Tau-Induced Neurotoxicity in Patient-Derived iPSC-  
404 Neurons. *J Neurosci* **41**, 4335-4348 (2021).

- 405 49. Penney, J., Ralvenius, W.T. & Tsai, L.H. Modeling Alzheimer's disease with iPSC-derived brain  
406 cells. *Mol Psychiatry* **25**, 148-167 (2020).
- 407 50. Haass, C. & Selkoe, D.J. Soluble protein oligomers in neurodegeneration: lessons from the  
408 Alzheimer's amyloid beta-peptide. *Nat Rev Mol Cell Biol* **8**, 101-112 (2007).
- 409 51. Cogswell, J.P. *et al.* Identification of miRNA changes in Alzheimer's disease brain and CSF yields  
410 putative biomarkers and insights into disease pathways. *J Alzheimers Dis* **14**, 27-41 (2008).
- 411 52. Lukiw, W.J., Andreeva, T.V., Grigorenko, A.P. & Rogaev, E.I. Studying micro RNA Function and  
412 Dysfunction in Alzheimer's Disease. *Front Genet* **3**, 327 (2012).
- 413 53. Sethi, P. & Lukiw, W.J. Micro-RNA abundance and stability in human brain: specific alterations  
414 in Alzheimer's disease temporal lobe neocortex. *Neurosci Lett* **459**, 100-104 (2009).
- 415 54. Wang, W.X., Huang, Q., Hu, Y., Stromberg, A.J. & Nelson, P.T. Patterns of microRNA expression  
416 in normal and early Alzheimer's disease human temporal cortex: white matter versus gray matter.  
417 *Acta Neuropathol* **121**, 193-205 (2011).
- 418 55. Banzhaf-Strathmann, J. *et al.* MicroRNA-125b induces tau hyperphosphorylation and cognitive  
419 deficits in Alzheimer's disease. *EMBO J* **33**, 1667-1680 (2014).
- 420 56. Tuorto, F. *et al.* RNA cytosine methylation by Dnmt2 and NSun2 promotes tRNA stability and  
421 protein synthesis. *Nat Struct Mol Biol* **19**, 900-905 (2012).
- 422 57. Sakita-Suto, S. *et al.* Aurora-B regulates RNA methyltransferase NSUN2. *Mol Biol Cell* **18**, 1107-  
423 1117 (2007).
- 424 58. Hussain, S. *et al.* The mouse cytosine-5 RNA methyltransferase NSun2 is a component of the  
425 chromatoid body and required for testis differentiation. *Mol Cell Biol* **33**, 1561-1570 (2013).
- 426 59. Hussain, S. *et al.* The nucleolar RNA methyltransferase Misu (NSun2) is required for mitotic  
427 spindle stability. *J Cell Biol* **186**, 27-40 (2009).
- 428 60. Frye, M. & Watt, F.M. The RNA methyltransferase Misu (NSun2) mediates Myc-induced  
429 proliferation and is upregulated in tumors. *Curr Biol* **16**, 971-981 (2006).



- 430 61. Blanco, S. *et al.* The RNA-methyltransferase Misu (NSun2) poises epidermal stem cells to  
431 differentiate. *PLoS Genet* **7**, e1002403 (2011).
- 432 62. Abbasi-Moheb, L. *et al.* Mutations in NSUN2 cause autosomal-recessive intellectual disability. *Am*  
433 *J Hum Genet* **90**, 847-855 (2012).
- 434 63. Yoon, K.J., Ming, G.L. & Song, H. Epitranscriptomes in the Adult Mammalian Brain: Dynamic  
435 Changes Regulate Behavior. *Neuron* **99**, 243-245 (2018).
- 436 64. Weng, Y.L. *et al.* Epitranscriptomic m(6)A Regulation of Axon Regeneration in the Adult  
437 Mammalian Nervous System. *Neuron* **97**, 313-325 e316 (2018).
- 438 65. Dermentzaki, G. & Lotti, F. New Insights on the Role of N (6)-Methyladenosine RNA Methylation  
439 in the Physiology and Pathology of the Nervous System. *Front Mol Biosci* **7**, 555372 (2020).
- 440 66. Khan, M.A. *et al.* Mutation in NSUN2, which encodes an RNA methyltransferase, causes  
441 autosomal-recessive intellectual disability. *Am J Hum Genet* **90**, 856-863 (2012).
- 442 67. Hussain, S. & Bashir, Z.I. The epitranscriptome in modulating spatiotemporal RNA translation in  
443 neuronal post-synaptic function. *Front Cell Neurosci* **9**, 420 (2015).
- 444 68. Zhang, Y. *et al.* Purification and Characterization of Progenitor and Mature Human Astrocytes  
445 Reveals Transcriptional and Functional Differences with Mouse. *Neuron* **89**, 37-53 (2016).
- 446 69. Zhang, Y. *et al.* An RNA-sequencing transcriptome and splicing database of glia, neurons, and  
447 vascular cells of the cerebral cortex. *J Neurosci* **34**, 11929-11947 (2014).
- 448 70. Satterlee, J.S. *et al.* Novel RNA modifications in the nervous system: form and function. *J Neurosci*  
449 **34**, 15170-15177 (2014).
- 450 71. Blanco, S. *et al.* Stem cell function and stress response are controlled by protein synthesis. *Nature*  
451 **534**, 335-340 (2016).
- 452 72. Telonis, A.G. *et al.* Dissecting tRNA-derived fragment complexities using personalized  
453 transcriptomes reveals novel fragment classes and unexpected dependencies. *Oncotarget* **6**, 24797-  
454 24822 (2015).

- 455 73. Magee, R. & Rigoutsos, I. On the expanding roles of tRNA fragments in modulating cell behavior.  
456 *Nucleic Acids Res* **48**, 9433-9448 (2020).
- 457 74. Hanada, T. *et al.* CLP1 links tRNA metabolism to progressive motor-neuron loss. *Nature* **495**, 474-  
458 480 (2013).
- 459 75. Li, Q. *et al.* tRNA-Derived Small Non-Coding RNAs in Response to Ischemia Inhibit  
460 Angiogenesis. *Sci Rep* **6**, 20850 (2016).
- 461 76. Magee, R., Londin, E. & Rigoutsos, I. TRNA-derived fragments as sex-dependent circulating  
462 candidate biomarkers for Parkinson's disease. *Parkinsonism Relat Disord* **65**, 203-209 (2019).
- 463 77. Prehn, J.H.M. & Jirstrom, E. Angiogenin and tRNA fragments in Parkinson's disease and  
464 neurodegeneration. *Acta Pharmacol Sin* **41**, 442-446 (2020).
- 465 78. Wu, W., Lee, I., Spratt, H., Fang, X. & Bao, X. tRNA-Derived Fragments in Alzheimer's Disease:  
466 Implications for New Disease Biomarkers and Neuropathological Mechanisms. *J Alzheimers Dis*  
467 **79**, 793-806 (2021).
- 468 79. Noorbakhsh, F., Vergnolle, N., Hollenberg, M.D. & Power, C. Proteinase-activated receptors in  
469 the nervous system. *Nat Rev Neurosci* **4**, 981-990 (2003).
- 470 80. Yang, L. *et al.* Proteinase-activated receptor 2 promotes cancer cell migration through RNA  
471 methylation-mediated repression of miR-125b. *J Biol Chem* **290**, 26627-26637 (2015).
- 472 81. Afkhami-Goli, A. *et al.* Proteinase-activated receptor-2 exerts protective and pathogenic cell type-  
473 specific effects in Alzheimer's disease. *J Immunol* **179**, 5493-5503 (2007).
- 474
- 475
- 476
- 477
- 478
- 479
- 480

481 **Figure legends**

482 **Figure 1. NSun2 RNA methyltransferase is dysregulated in Alzheimer's Disease.** (A) Representative  
483 NSun2 immunohistochemistry images of the hippocampal formation (Cornu Ammonis1 (CA1)) and  
484 prefrontal cortex (Brodmann area 9) of age-matched controls and AD human brains. Scale bars, 50  $\mu$ m. (B)  
485 Western blot quantification of NSun2 protein levels in human hippocampus of controls ( $n = 9$ ) and AD ( $n$   
486 = 8). (C) Western blot quantification of NSun2 protein levels in the prefrontal cortex of AD patients ( $n =$   
487 14) compared to their respective controls ( $n = 16$ ). (D) Western blot quantification of NSun2 protein levels  
488 in the cerebellum of controls ( $n = 6$ ) and AD patients ( $n = 6$ ). Mann Whitney  $U$  Test; \*\*\* $P < 0.001$ , \*\*\*\* $P$   
489  $< 0.0001$ . Data represent mean  $\pm$  SEM. (E) Western blot quantification of NSun2 protein levels in the  
490 hippocampus of 6-month-old J20 mice ( $n = 8$ ) and non-transgenic controls ( $n = 8$ ). (F) Western blot  
491 quantitative analysis on APP<sup>V717L</sup> ( $n = 3$ ) and isogenic control ( $n = 3$ ) iPSC-derived neurons for NSun2  
492 protein. Student's  $t$  test; \*\* $P < 0.01$ , \*\*\* $P < 0.001$ . Data represent mean  $\pm$  SEM. (B-F) Top portion of the  
493 panels shows representative Western blots. (B-G) Histograms show densitometric quantification of NSun2  
494 protein abundance with respect to control at the bottom of the panels. NSun2 is normalized by  $\beta$ -actin in all  
495 samples.

496  
497 **Figure 2. Regulation of tau toxicity and tau phosphorylation by NSun2.** (A) Co-expression of NSun2  
498 RNAi ( $n = 26$ ) with human tau exacerbated the rough eye phenotype compared with that observed in the  
499 GFP RNAi control ( $n = 29$ ). (B) Co-expression of NSun2 ( $n = 18$ ) partially suppressed the human tau-  
500 induced rough eye phenotype compared with that seen in the GFP control ( $n = 28$ ). The yellow marked area  
501 shows the degenerated part of eyes. Scale bars, 200  $\mu$ m. Histograms show quantitative assessment of eye  
502 phenotypes (\*\*\*\* $P \leq 0.0001$  by Mann-Whitney  $U$  test). (C) human iPSC derived neurons were transduced  
503 with shNSun2 or scramble control, and protein lysates collected and analyzed. Representative Western blots  
504 with indicated antibodies demonstrated the effects of shNSun2 on the levels of phosphorylated forms of  
505 tau. (D) Quantification of phosphorylated tau in neurons transduced with shNSun2, plotted relative to the

506 levels of total tau (after normalization of total tau with  $\beta$ -actin levels). (Student's t test;  $*P < 0.05$ ). Data  
507 represent mean  $\pm$  SEM.

508

509 **Figure 3. NSun2 is downregulated in response to A $\beta$ O.** (A) Western blot quantification of NSun2 protein  
510 levels in rat primary hippocampal neurons untreated (control) or treated with 300 nM A $\beta$  oligomers (A $\beta$ O)  
511 for the indicated times (Student's t test;  $*P < 0.05$ ). Top portion of the panel shows representative Western  
512 blots. Histograms show densitometric quantification of NSun2 protein levels (bottom of the panel). NSun2  
513 values are normalized against beta-actin. Data represent mean  $\pm$  SEM. (B) qPCR analysis of NSun2 mRNA  
514 levels in rat primary hippocampal neurons untreated (control) or treated with 300 nM A $\beta$ O for the indicated  
515 times. No significant changes in the levels of NSun2 mRNA are found. (C) Western blot quantification of  
516 phospho-tau levels in rat primary hippocampal neurons untreated (control) or treated with 300 nM A $\beta$ O for  
517 24 hours. Top portion of the panel shows representative Western blots. Phospho-Serine 214-tau corresponds  
518 to the top band; Total tau corresponds to the middle band and beta-actin to the bottom band. Densitometric  
519 quantification of phospho-tau protein levels is shown at the bottom of the panel. Phospho-tau levels are  
520 plotted relative to the levels of total tau (after normalization of total tau with  $\beta$ -actin levels) (Student's t  
521 test;  $*P < 0.05$ ). (D) Rat primary hippocampal neurons were transduced with shNSun2 or scramble control,  
522 and protein lysates were collected and analyzed. Representative Western blots with indicated antibodies  
523 demonstrated the effects of shNSun2 on the levels of phosphorylated forms of tau. (E) Quantification of  
524 phosphorylated tau in neurons transduced with shNSun2, plotted relative to the levels of total tau (after  
525 normalization of total tau with  $\beta$ -actin levels). (Student's t test;  $*P < 0.05$ ). Data represent mean  $\pm$  SEM.  
526 (F) Double immunofluorescence with NSun2 (yellow) and phospho-tau (AT8, red) antibodies in  
527 hippocampus of human AD brain. White arrowheads show NSun2 and AT8 positive  
528 immunostaining. Scale bars, 50  $\mu$ m.

529

530

531 **Figure 4. NSun2 deficiency alters miR-125b methylation, miR-125b levels, and promotes tau**  
532 **hyperphosphorylation *in vivo*.** (A-B) RNA was isolated from the forebrain of NSun2 KO and non-  
533 transgenic controls and subjected to IP analysis using anti-m6A or IgG antibody. The presence of miR-  
534 125b in the Input ( $n=3$ ) m6A ( $n=3$ ) and IgG ( $n = 3$ ; used as negative control) materials was analyzed by  
535 QPCR. Histograms show quantification of miR-125b levels with respect to control in Input and m6A  
536 materials. (Student's  $t$  test;  $*P < 0.05$ ). Data represent mean  $\pm$  SEM. (C) Representative images of  
537 immunohistochemistry with AT8 antibody in the dentate gyrus (top panels) and frontal cortex (bottom  
538 panels) of 9-month-old NSun2 KO and non-transgenic control mice showing a marked increase in phospho-  
539 tau immunostaining in NSun2 KO animals. Scale bars, 100  $\mu$ m.

540

541

**A**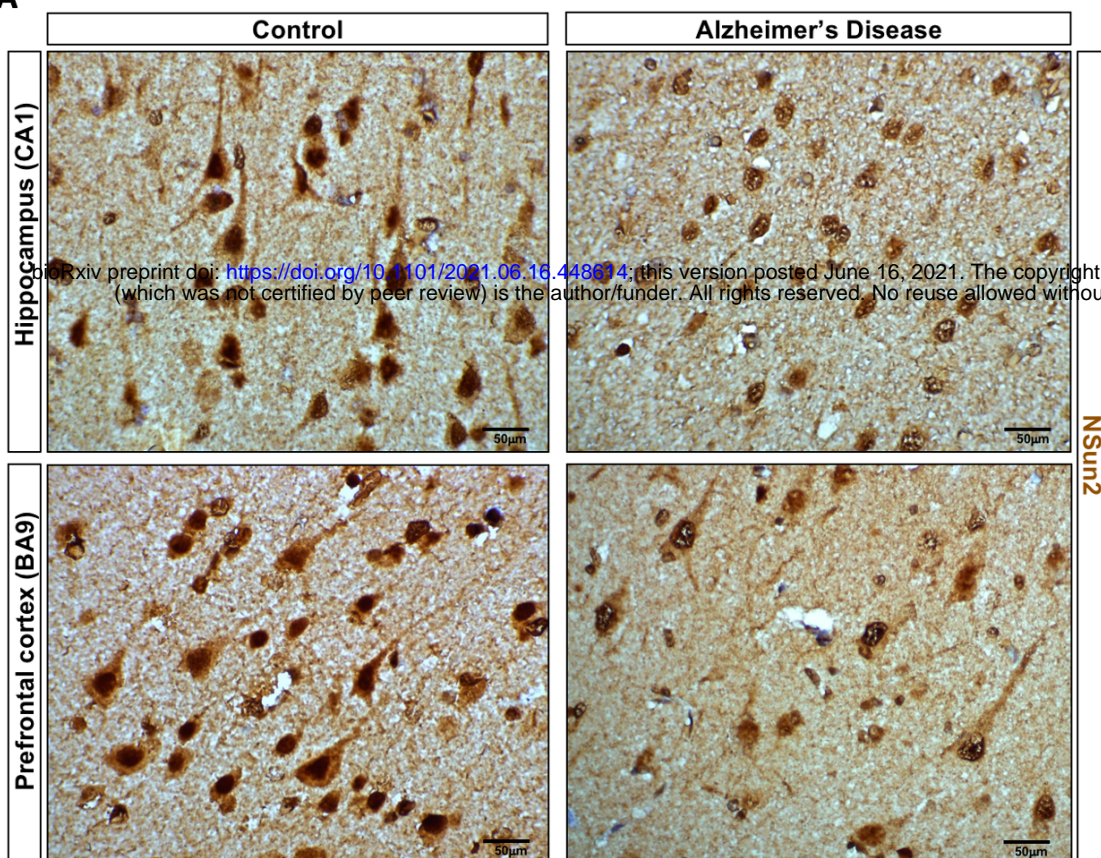**B**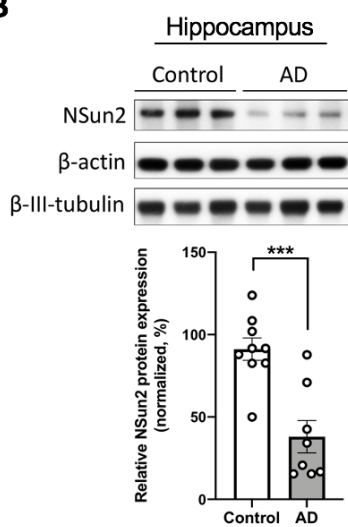**C**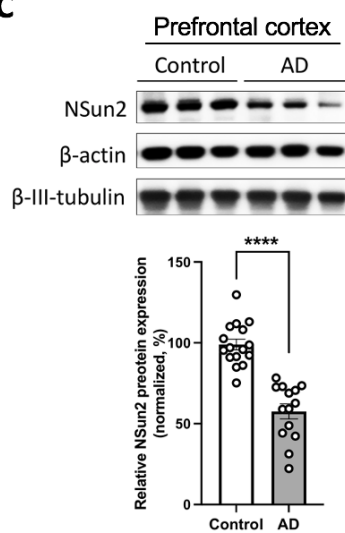**D**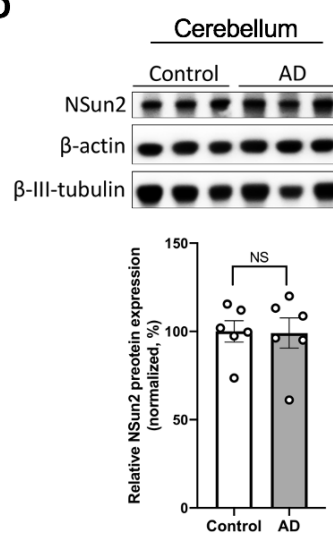**E**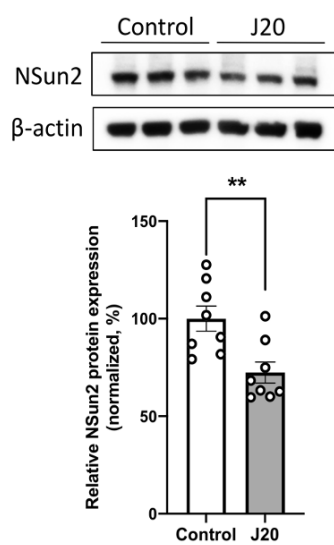**F**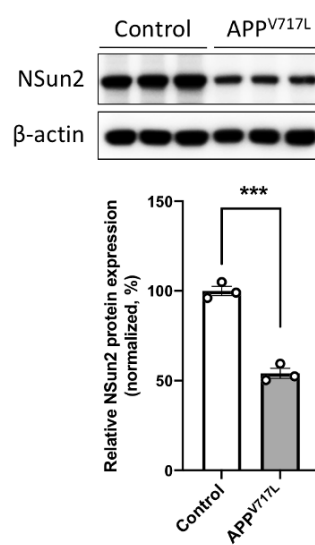**Figure 1**

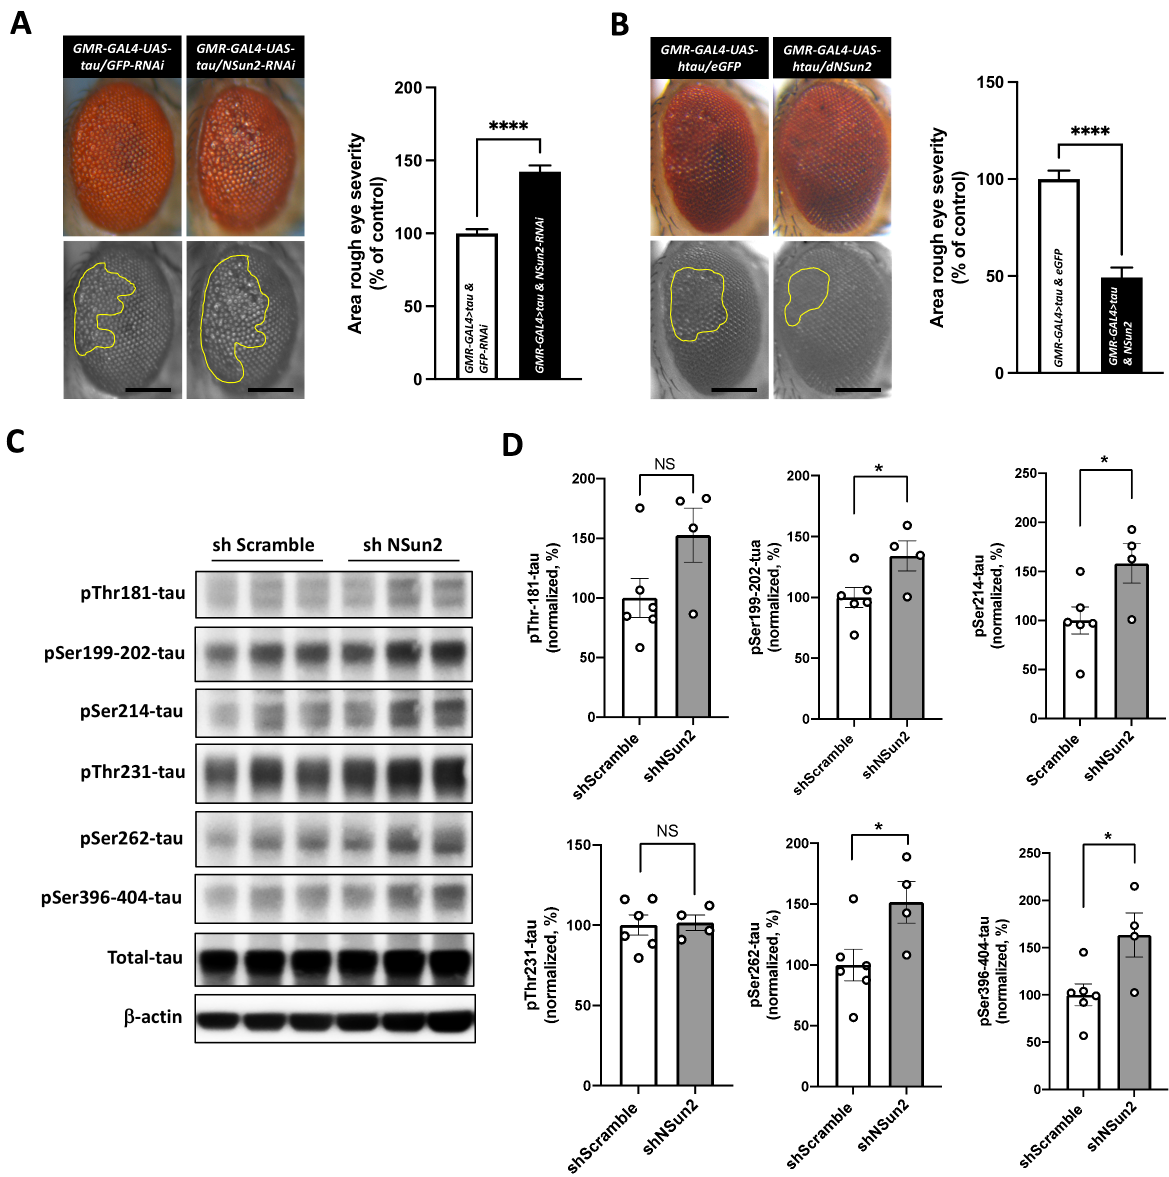

Figure 2

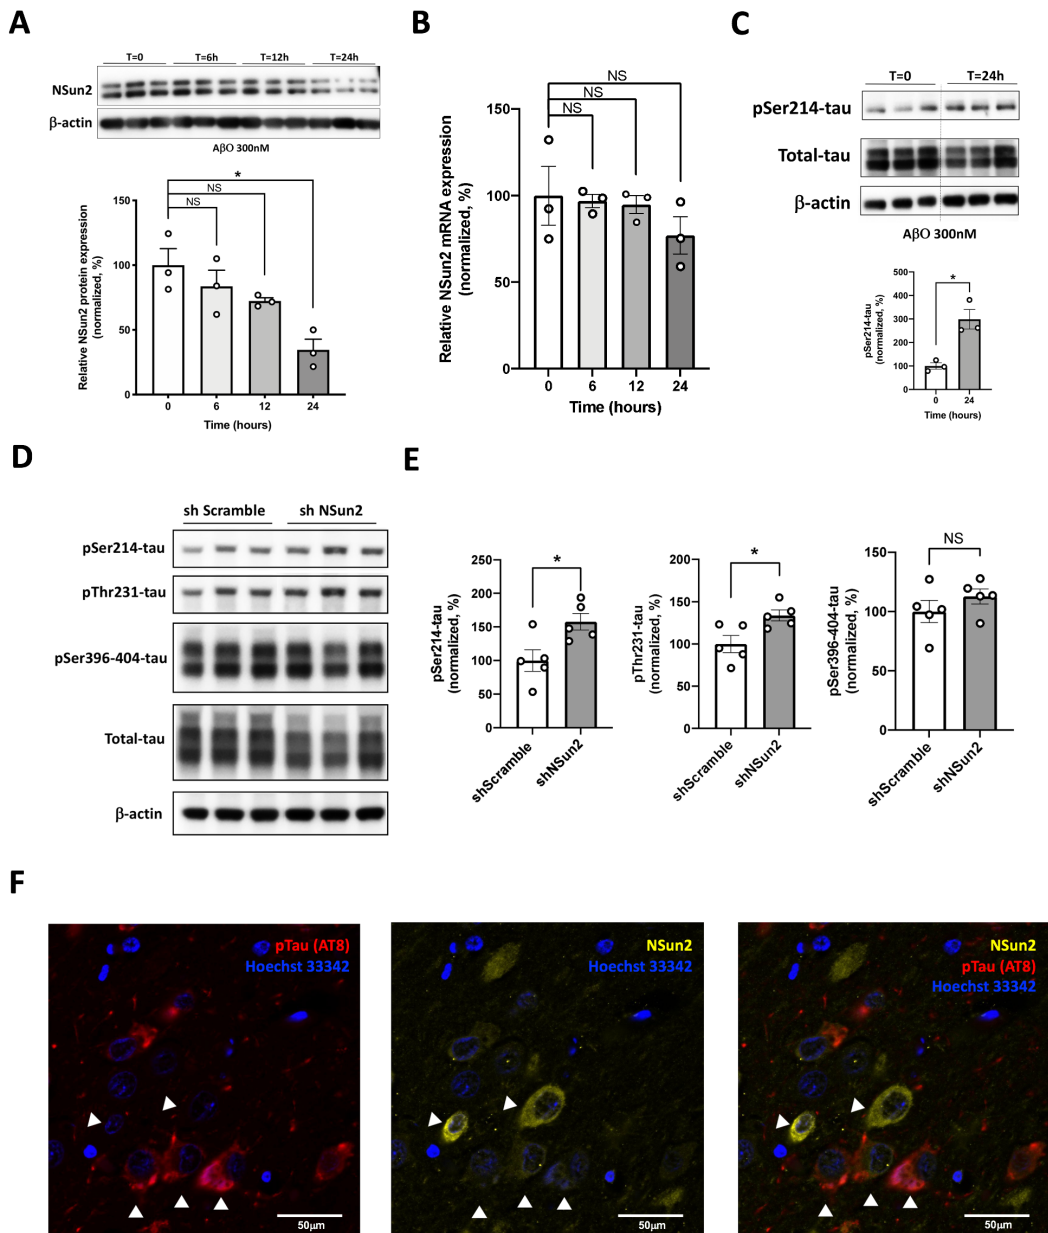

Figure 3



**A****m6A-IP**

bioRxiv preprint doi: <https://doi.org/10.1101/2021.06.16.448614>; this version posted June 16, 2021. The copyright holder for this preprint (which was not certified by peer review) is the author/funder. All rights reserved. No reuse allowed without permission.

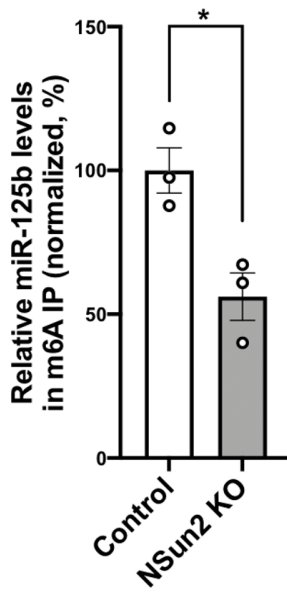**B****Input**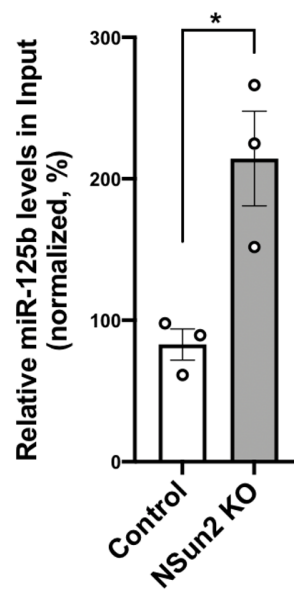**C**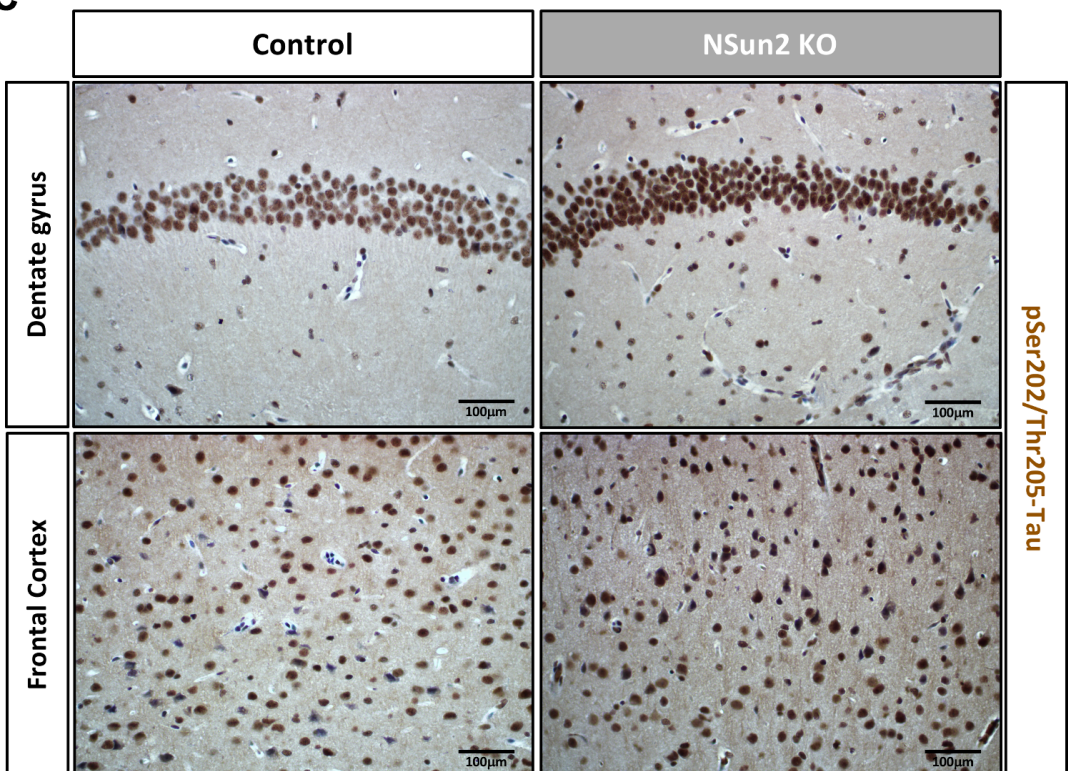**Figure 4**
